# Supplementary material
Source: PubMed Central journal article supplement (PMC7347229)
Supplement: NIHMS1599117-supplement-sup_info.pdf [file NIHMS1599117-supplement-sup_info.pdf]

# The Journal of Physiology Statistical Summary Document

**Manuscript Title:** The Effect of Lifelong Endurance Exercise on Cardiovascular Structure and Exercise Function in Women

**Authors:** Graeme Carrick-Ranson, Nikita M. Sloane, Erin J. Howden, Paul S. Bhella, Satyam Sarma, Shigeki Shibata; Naoki Fujimoto, Jeffrey L. Hastings, and Benjamin D. Levine

**Animal model used, if applicable:** NA

**Underlying hypothesis:**

We hypothesized that  $\dot{V}O_2$ max, exercise stroke volume, LV mass and blood volume would be significantly larger and LV chamber compliance more “youthful” in women who had performed lifelong exercise compared to older untrained women and would reflect those observed in the middle-aged untrained women.

**Definitions of ‘n’:**

[Define ‘n’. If definitions differ, please indicate which definition applies to which experimental question number.]

**Statistical summary table:**

| Experimental question number*                                                                                                                 | Finding/conclusion                                                                             | Experimental location/variable<br>e.g. cortex vs cerebellum or genotype | Mean value<br>(or other summary statistic) | SD                               | n (value)                     | P**                                                                                                        | Units | Data comparisons<br>e.g. WT vs KO           | Statistical test                                                                                                | Any other variable<br>e.g. subjects’ age or sex | Figure/table in which data are presented | Comments<br>e.g. observation |
|-----------------------------------------------------------------------------------------------------------------------------------------------|------------------------------------------------------------------------------------------------|-------------------------------------------------------------------------|--------------------------------------------|----------------------------------|-------------------------------|------------------------------------------------------------------------------------------------------------|-------|---------------------------------------------|-----------------------------------------------------------------------------------------------------------------|-------------------------------------------------|------------------------------------------|------------------------------|
| Cardiac output (L/min) at maximal exercise is larger in older trained (OT) women compared to older untrained (OU) and middle-aged (MA) women. | Maximal cardiac output (L/min) is significantly larger in OT women compared to older OU and MA | Maximal cardiac output                                                  | Mean<br>MA 11.7<br>OU 10.0<br>OT 14.1      | SD<br>MA 2.0<br>OU 1.6<br>OT 2.7 | MA n=22<br>OU n=35<br>OT n=13 | OT vs. OU<br><b>p&lt;0.001</b><br><br>OT vs. MA<br><b>p&lt;0.001</b><br><br>MA vs. OU<br><b>p&lt;0.001</b> | L/min | OT vs. OU<br><br>OT vs. MA<br><br>MA vs. OU | Repeated measures ANOVA<br><br>Group main effect<br><b>p&lt;0.001</b><br><br>Bonferroni <i>post hoc</i> testing | NA                                              | Figure 1A                                |                              |

# The Journal of Physiology

## Statistical Summary Document

|                                                                                                                                                                |                                                                                                      |                                                 |                                          |                                     |                               |                                                                                                  |                   |                                             |                                                                                                                 |    |           |  |
|----------------------------------------------------------------------------------------------------------------------------------------------------------------|------------------------------------------------------------------------------------------------------|-------------------------------------------------|------------------------------------------|-------------------------------------|-------------------------------|--------------------------------------------------------------------------------------------------|-------------------|---------------------------------------------|-----------------------------------------------------------------------------------------------------------------|----|-----------|--|
| Stroke volume at maximal exercise is larger in older trained (OT) women compared to older untrained (OU) and middle-aged (MA) women.                           | Maximal stroke volume was significantly larger in OT compared to OU and MA                           | Maximal stroke volume                           | Mean<br>MA 67.0<br>OU 61.2<br>OT 84.6    | SD<br>MA 13.3<br>OU 10.0<br>OT 17.5 | MA n=22<br>OU n=35<br>OT n=13 | OT vs. OU<br><b>p&lt;0.001</b><br><br>OT vs. MA<br><b>p&lt;0.001</b><br><br>MA vs. OU<br>p=0.282 | ml                | OT vs. OU<br><br>OT vs. MA<br><br>MA vs. OU | Repeated measures ANOVA<br><br>Group main effect<br><b>p&lt;0.001</b><br><br>Bonferroni <i>post hoc</i> testing | NA | Not shown |  |
| Stroke index at maximal exercise is larger in older trained (OT) women compared to older untrained (OU) and middle-aged (MA) women.                            | Maximal stroke index was significantly larger in OT compared to OU and MA                            | Maximal stroke index                            | Mean<br>MA 39.1<br>OU 35.2<br>OT 53.7    | SD<br>MA 6.4<br>OU 5.7<br>OT 11.7   | MA n=22<br>OU n=35<br>OT n=13 | OT vs. OU<br><b>p&lt;0.001</b><br><br>OT vs. MA<br><b>p&lt;0.001</b><br><br>MA vs. OU<br>p=0.137 | ml/m <sup>2</sup> | OT vs. OU<br><br>OT vs. MA<br><br>MA vs. OU | Repeated measures ANOVA<br><br>Group main effect<br><b>p&lt;0.001</b><br><br>Bonferroni <i>post hoc</i> testing | NA | Figure 1B |  |
| Stroke volume relative to fat-free mass is larger at maximal exercise in older trained (OT) women compared to older untrained (OU) and middle-aged (MA) women. | Maximal stroke volume relative to fat free mass was significantly larger in OT compared to OU and MA | Maximal stroke volume relative to fat-free mass | Mean<br>MA 1.62<br>OU 1.50<br>OT 2.10    | SD<br>MA 0.25<br>OU 0.28<br>OT 0.31 | MA n=21<br>OU n=35<br>OT n=12 | OT vs. OU<br><b>p&lt;0.001</b><br><br>OT vs. MA<br><b>p&lt;0.001</b><br><br>MA vs. OU<br>p=0.250 | ml/kgFFM          | OT vs. OU<br><br>OT vs. MA<br><br>MA vs. OU | Repeated measures ANOVA<br><br>Group main effect<br><b>p&lt;0.001</b><br><br>Bonferroni <i>post hoc</i> testing | NA | Figure 1C |  |
| Heart rate at maximal exercise will not be different in older trained (OT) women compared to                                                                   | Maximal heart rate was not significantly different among groups                                      | Maximal heart rate                              | Mean<br>MA 175.5<br>OU 164.7<br>OT 167.3 | SD<br>MA 7.6<br>OU 10.8             | MA n=22<br>OU n=35<br>OT n=13 |                                                                                                  | bpm               | OT vs. OU<br><br>OT vs. MA<br><br>MA vs. OU | Repeated measures ANOVA<br><br>Group main effect<br>p=0.287                                                     | NA | Figure 1D |  |

# The Journal of Physiology

## Statistical Summary Document

|                                                                                                                                                          |                                                                                                                           |                                                  |                                          |                                     |                         |                                                                                       |                        |                                     |                                                                                                                 |    |           |  |
|----------------------------------------------------------------------------------------------------------------------------------------------------------|---------------------------------------------------------------------------------------------------------------------------|--------------------------------------------------|------------------------------------------|-------------------------------------|-------------------------|---------------------------------------------------------------------------------------|------------------------|-------------------------------------|-----------------------------------------------------------------------------------------------------------------|----|-----------|--|
| older untrained (OU) and middle-aged (MA) women.                                                                                                         |                                                                                                                           |                                                  |                                          | OT 8.9                              |                         |                                                                                       |                        |                                     |                                                                                                                 |    |           |  |
| Mean arterial pressure (MAP) at maximal exercise will be higher in older trained (OT) and older untrained (OU) women compared to middle-aged (MA) women. | Maximal MAP was not significantly different among groups                                                                  | Maximal MAP                                      | Mean<br>MA 120.9<br>OU 118.8<br>OT 117.4 | SD<br>MA 13.1<br>OU 14.0<br>OT 5.3  | MA=20<br>OU=35<br>OT=13 |                                                                                       | mmHg                   | OT vs. OU<br>OT vs. MA<br>MA vs. OU | Repeated measures ANOVA<br><br>Group main effect<br>p=0.358                                                     | NA | Figure 1E |  |
| Effective elastance index at maximal exercise will be lower in older trained (OT) women compared to older untrained (OU) and middle-aged (MA) women.     | Effective elastance index at maximal exercise was significantly lower in OT women compared to OU women.                   | Effective elastance index at maximal exercise    | Mean<br>MA 4.3<br>OU 4.7<br>OT 3.1       | SD<br>MA 1.0<br>OU 0.9<br>OT 0.7    | MA=20<br>OU=35<br>OT=13 | OT vs. OU<br><b>p&lt;0.001</b><br>OT vs. MA<br><b>p=0.012</b><br>MA vs. OU<br>p=0.186 | mmHg/ml/m <sup>2</sup> | OT vs. OU<br>OT vs. MA<br>MA vs. OU | Repeated measures ANOVA<br><br>Group main effect<br><b>p&lt;0.001</b><br><br>Bonferroni <i>post hoc</i> testing | NA | Figure 1F |  |
| Systemic arterial compliance at maximal exercise will be higher in older trained (OT) women compared to older untrained (OU) and middle-aged (MA) women. | Systemic arterial compliance at maximal exercise was not significantly different in OT women compared to OU and MA women. | Systemic arterial compliance at maximal exercise | Mean<br>MA 0.47<br>OU 0.43<br>OT 0.57    | SD<br>MA 0.16<br>OU 0.16<br>OT 0.14 | MA=20<br>OU=35<br>OT=13 | OT vs. OU<br>p=0.450<br>OT vs. MA<br>p=1.000<br>MA vs. OU<br>p=1.000                  | ml/mmHg/m <sup>2</sup> | OT vs. OU<br>OT vs. MA<br>MA vs. OU | Repeated measures ANOVA<br><br>Group main effect<br><b>p=0.006</b><br><br>Bonferroni <i>post hoc</i> testing    | NA | Figure 1G |  |

# The Journal of Physiology Statistical Summary Document

|                                                                                                                                                         |                                                                                                                                             |                                                                   |                                                                                                   |                                        |                               |                                                                                                  |                          |                                             |                                                                                                              |    |                       |  |
|---------------------------------------------------------------------------------------------------------------------------------------------------------|---------------------------------------------------------------------------------------------------------------------------------------------|-------------------------------------------------------------------|---------------------------------------------------------------------------------------------------|----------------------------------------|-------------------------------|--------------------------------------------------------------------------------------------------|--------------------------|---------------------------------------------|--------------------------------------------------------------------------------------------------------------|----|-----------------------|--|
| Systemic vascular resistance at maximal exercise will be lower in older trained (OT) women compared to older untrained (OU) and middle-aged (MA) women. | Systemic arterial compliance at maximal exercise was significantly lower in OT women compared to OU but not different compared to MA women. | Systemic vascular resistance at maximal exercise                  | Mean<br>MA 858.4<br>OU 974.8<br>OT 673.7                                                          | SD<br>MA 220.3<br>OU 194.5<br>OT 171.2 | MA=20<br>OU=35<br>OT=12       | OT vs. OU<br><b>p=0.023</b><br><br>OT vs. MA<br>p=0.704<br><br>MA vs. OU<br>p=0.308              | dyne/s/cm <sup>5</sup>   | OT vs. OU<br><br>OT vs. MA<br><br>MA vs. OU | Repeated measures ANOVA<br><br>Group main effect<br><b>p=0.035</b><br><br>Bonferroni <i>post hoc</i> testing | NA | Figure 1H             |  |
| The Starling (stroke volume-filling pressure) relationship will not be significantly different between older untrained (OU) and middle-aged (MA) women  | The Starling relationship was not significantly different among groups.                                                                     | Slope of the relationship between stroke volume-filling pressure. | Median (25-75%)<br>MA 8.0 (3.9 - 9.0)<br>OU 6.0 (5.2 - 7.1)<br>OT 5.6 (4.5 - 6.7)                 |                                        | MA=22<br>OU=35<br>OT=13       |                                                                                                  | ml.m <sup>2</sup> x mmHg | OT vs. OU<br><br>OT vs. MA<br><br>MA vs. OU | Kruskal-Wallis ANOVA on ranks.<br><br>ANOVA<br>p=0.228                                                       | NA | Figure 2A             |  |
| Preload-recruitable stroke work would not be significantly different among older trained (OT), older untrained (OU) and middle-aged (MA) women          | The slope of preload-recruitable stroke work was significantly steeper in OU compared to OT and MA                                          | The slope of preload-recruitable stroke work                      | Median (25-75%)<br>MA 103.8 (93.4 - 113.2)<br>OU 177.8 (143.5 - 264.3)<br>OT 116.5 (98.4.- 139.4) |                                        | MA n=22<br>OU n=35<br>OT n=13 | OT vs. OU<br><b>p&lt;0.001</b><br><br>OT vs. MA<br>p=0.924<br><br>MA vs. OU<br><b>p&lt;0.001</b> | ml x mmHg                | OT vs. OU<br><br>OT vs. MA<br><br>MA vs. OU | Kruskal-Wallis ANOVA on ranks.<br><br>ANOVA<br><b>p&lt;0.001</b>                                             | NA | Figure 2B             |  |
| Left ventricular chamber compliance is                                                                                                                  | Left ventricular chamber                                                                                                                    | Left ventricular stiffness constant                               | Median (25-75%)                                                                                   |                                        | MA n=22<br>OU n=34<br>OT n=13 | OT vs. OU<br><b>p&lt;0.001</b>                                                                   | Compliance units         | OT vs. OU                                   | Kruskal-Wallis                                                                                               | NA | Figure 3A and Table 4 |  |

# The Journal of Physiology Statistical Summary Document

|                                                                                                                                                                                                      |                                                                                                            |                                                                        |                                                                                                             |                                     |                               |                                                                              |                  |                                             |                                                                                              |    |           |  |
|------------------------------------------------------------------------------------------------------------------------------------------------------------------------------------------------------|------------------------------------------------------------------------------------------------------------|------------------------------------------------------------------------|-------------------------------------------------------------------------------------------------------------|-------------------------------------|-------------------------------|------------------------------------------------------------------------------|------------------|---------------------------------------------|----------------------------------------------------------------------------------------------|----|-----------|--|
| greater in older trained (OT) women compared to older untrained (OU) but not significantly different compared to middle-aged (MA) women.                                                             | compliance was significantly greater in OT compared to OU                                                  |                                                                        | MA 0.0650 (0.0487 - 0.0799)<br>OU 0.0854 (0.0609 - 0.138)<br>OT 0.0469 (0.0306 - 0.0543)                    |                                     |                               | OT vs. MA<br>p=0.053<br><br>MA vs. OU<br>p=0.018                             |                  | OT vs. MA<br><br>MA vs. OU                  | ANOVA on ranks.<br><br>ANOVA<br>p<0.001<br><br>Dunn's <i>post hoc</i> testing                |    |           |  |
| Left ventricular transmural pressure-volume relationship is greater in older trained (OT) women compared to older untrained (OU) but not significantly different compared to middle-aged (MA) women. | Left ventricular transmural pressure-volume relationship significantly greater in OT compared to OU        | Pericardial constraint                                                 | Median (25-75%)<br>MA 0.0568 (0.0387 - 0.0655)<br>OU 0.0691 (0.0529 - 0.758)<br>OT 0.0336 (0.0185 - 0.0674) |                                     | MA n=22<br>OU n=34<br>OT n=13 | OT vs. OU<br>p=0.007<br><br>OT vs. MA<br>p=0.720<br><br>MA vs. OU<br>p=0.106 | Compliance units | OT vs. OU<br><br>OT vs. MA<br><br>MA vs. OU | Kruskal-Wallis ANOVA on ranks.<br><br>ANOVA<br>p=0.005<br><br>Dunn's <i>post hoc</i> testing | NA | Figure 3B |  |
| VO <sub>2</sub> max in absolute levels is larger in older trained (OT) women compared to older untrained (OU) and middle-aged (MA) women.                                                            | VO <sub>2</sub> max in absolute levels is larger mass was significantly larger in OT compared to OU and MA | Maximal oxygen uptake (VO <sub>2</sub> max) in absolute levels (L/min) | Mean<br>MA 1.60<br>OU 1.42<br>OT 1.81                                                                       | SD<br>MA 0.29<br>OU 0.24<br>OT 0.20 | MA n=22<br>OT n=35<br>OU n=13 | OT vs. OU<br>p<0.001<br><br>OT vs. MA<br>p=0.054<br><br>MA vs. OU<br>p=0.034 | ml/min           | OT vs. OU<br><br>OT vs. MA<br><br>MA vs. OU | One factor ANOVA<br><br>ANOVA<br>p<0.001.<br><br>Bonferroni <i>post hoc</i> testing          | NA | Table 3   |  |
| VO <sub>2</sub> max relative to total body mass is larger in older trained (OT)                                                                                                                      | VO <sub>2</sub> max relative to total body mass was                                                        | Maximal oxygen uptake (VO <sub>2</sub> max)                            | Median (25-75%)                                                                                             |                                     | MA n=22<br>OT n=35<br>OU n=13 | OT vs. OU<br>p<0.001<br><br>OT vs. MA                                        | ml/kg/min        | OT vs. OU<br><br>OT vs. MA                  | Kruskal-Wallis                                                                               | NA | Table 3   |  |

# The Journal of Physiology

## Statistical Summary Document

|                                                                                                                                                                                             |                                                                                                               |                                                                       |                                                                                                                 |                                              |                               |                                                                                                      |                          |                                             |                                                                                                     |    |         |  |
|---------------------------------------------------------------------------------------------------------------------------------------------------------------------------------------------|---------------------------------------------------------------------------------------------------------------|-----------------------------------------------------------------------|-----------------------------------------------------------------------------------------------------------------|----------------------------------------------|-------------------------------|------------------------------------------------------------------------------------------------------|--------------------------|---------------------------------------------|-----------------------------------------------------------------------------------------------------|----|---------|--|
| women compared to older untrained (OU) and middle-aged (MA) women.                                                                                                                          | significantly larger in OT compared to OU and MA                                                              | relative to total body mass                                           | MA 25.9<br>(21.6 - 27.8)<br><br>OU 21.5<br>(18.5 - 24.3)<br><br>OT 34.0<br>(29.2 - 38.9)                        |                                              |                               | <b>p=0.015</b><br><br>MA vs. OU<br><b>p=0.013</b>                                                    |                          | MA vs. OU                                   | ANOVA on ranks.<br><br>ANOVA<br><b>p&lt;0.001</b><br><br>Dunn's <i>post hoc</i> testing             |    |         |  |
| VO <sub>2</sub> max relative to fat-free mass is larger in older trained (OT) women compared to older untrained (OU) and middle-aged (MA) women.                                            | VO <sub>2</sub> max relative to fat-free mass was significantly larger in OT compared to OU and MA            | Maximal oxygen uptake (VO <sub>2</sub> max) relative to fat-free mass | Mean<br><br>MA 39.1<br><br>OU 34.6<br><br>OT 46.4                                                               | SD<br><br>MA 4.7<br><br>OU 5.4<br><br>OT 6.5 | MA n=22<br>OT n=35<br>OU n=13 | OT vs. OU<br><b>p&lt;0.001</b><br><br>OT vs. MA<br><b>p=0.001</b><br><br>MA vs. OU<br><b>p=0.011</b> | ml/kg/min                | OT vs. OU<br><br>OT vs. MA<br><br>MA vs. OU | One factor ANOVA<br><br>ANOVA<br><b>p&lt;0.001</b><br><br>Bonferroni <i>post hoc</i> testing        | NA | Table 3 |  |
| Dynamic operating stiffness during LV unloading is greater in older trained (OT) women compared to older untrained (OU) but not significantly different compared to middle-aged (MA) women. | Dynamic cardiac compliance during cardiac unloading was significantly lower in OU women compared to OT women. | Dynamic cardiac compliance                                            | Median (25-75%)<br><br>MA 0.47<br>(0.38 - 0.55)<br><br>OU 0.58<br>(0.37 - 0.81)<br><br>OT 0.41<br>(0.30 - 0.44) |                                              | MA n=22<br>OT n=35<br>OU n=13 | OT vs. OU<br><b>p=0.013</b><br><br>OT vs. MA<br>p=0.324<br><br>MA vs. OU<br>p=0.538                  | ΔmmHg/Δml/m <sup>2</sup> | OT vs. OU<br><br>OT vs. MA<br><br>MA vs. OU | Kruskal-Wallis ANOVA on ranks.<br><br>ANOVA<br><b>p=0.015</b><br><br>Dunn's <i>post hoc</i> testing | NA | Table 4 |  |
| Dynamic operating stiffness during LV loading is greater in older trained (OT) women compared to                                                                                            | Dynamic cardiac compliance during cardiac unloading was significantly lower in OU women                       | Dynamic cardiac compliance                                            | Median (25-75%)<br><br>MA 1.10<br>(0.79 - 1.55)                                                                 |                                              | MA n=20<br>OT n=35<br>OU n=12 | OT vs. OU<br><b>p=0.006</b><br><br>OT vs. MA<br>p=1.000<br><br>MA vs. OU                             | ΔmmHg/Δml/m <sup>2</sup> | OT vs. OU<br><br>OT vs. MA<br><br>MA vs. OU | Kruskal-Wallis ANOVA on ranks.<br><br>ANOVA<br><b>p&lt;0.001</b>                                    | NA | Table 4 |  |

# The Journal of Physiology

## Statistical Summary Document

|                                                                                                                                                    |                                                                                              |                                                 |                                                                                                                 |  |                               |                                                                                            |                  |                                             |                                                                                                     |    |         |  |
|----------------------------------------------------------------------------------------------------------------------------------------------------|----------------------------------------------------------------------------------------------|-------------------------------------------------|-----------------------------------------------------------------------------------------------------------------|--|-------------------------------|--------------------------------------------------------------------------------------------|------------------|---------------------------------------------|-----------------------------------------------------------------------------------------------------|----|---------|--|
| older untrained (OU) but not significantly different compared to middle-aged (MA) women.                                                           | compared to OT and MU women.                                                                 |                                                 | OU 2.39<br>(1.20 - 3.83)<br><br>OT 1.08<br>(0.95 - 1.62)                                                        |  |                               | <b>p&lt;0.001</b>                                                                          |                  |                                             | Dunn's <i>post hoc</i> testing                                                                      |    |         |  |
| Left ventricular mass is larger in older trained (OT) women compared to older untrained (OU) and middle-aged (MA) women.                           | Left ventricular mass was not significantly different among groups                           | Left ventricular mass                           | Median (25-75%)<br><br>MA 77.6<br>(69.5 - 91.6)<br><br>OU 76.2<br>(69.8 - 87.8)<br><br>OT 78.8<br>(74.0 - 85.7) |  | MA n=19<br>OU n=35<br>OT n=12 |                                                                                            | g                | OT vs. OU<br><br>OT vs. MA<br><br>MA vs. OU | Kruskal-Wallis ANOVA on ranks.<br><br>ANOVA<br>p=0.820                                              | NA | Table 5 |  |
| Left ventricular mass relative to BSA is larger in older trained (OT) women compared to older untrained (OU) and middle-aged (MA) women.           | Left ventricular mass relative to BSA was significantly larger in OT compared to OU and MA   | Left ventricular mass index                     | Median (25-75%)<br><br>MA 46.5<br>(41.5 - 48.6)<br><br>OU 44.7<br>(41.0 - 49.6)<br><br>OT 51.8<br>(48.5 - 53.9) |  | MA n=19<br>OU n=35<br>OT n=12 | OT vs. OU<br><b>p=0.002</b><br><br>OT vs. MA<br><b>p=0.020</b><br><br>MA vs. OU<br>p=1.000 | g/m <sup>2</sup> | OT vs. OU<br><br>OT vs. MA<br><br>MA vs. OU | Kruskal-Wallis ANOVA on ranks.<br><br>ANOVA<br><b>p=0.002</b><br><br>Dunn's <i>post hoc</i> testing | NA | Table 5 |  |
| Left ventricular mass relative to fat-free mass is larger in older trained (OT) women compared to older untrained (OU) and middle-aged (MA) women. | Left ventricular mass relative to fat-free mass was not significantly different among groups | Left ventricular mass relative to fat-free mass | Median (25-75%)<br><br>MA 1.9 (1.7 - 2.1)<br><br>OU 1.9 (1.8 - 2.0)<br><br>OT 2.0 (1.8 - 2.4)                   |  | MA n=18<br>OU n=35<br>OT n=12 |                                                                                            | g/kgFFM          | OT vs. OU<br><br>OT vs. MA<br><br>MA vs. OU | Kruskal-Wallis ANOVA on ranks.<br><br>ANOVA<br>p=0.338                                              | NA | Table 5 |  |

# The Journal of Physiology

## Statistical Summary Document

|                                                                                                                                                                    |                                                                                           |                                             |                                             |                                     |                               |                                                                             |                   |                                     |                                                                                         |    |         |  |
|--------------------------------------------------------------------------------------------------------------------------------------------------------------------|-------------------------------------------------------------------------------------------|---------------------------------------------|---------------------------------------------|-------------------------------------|-------------------------------|-----------------------------------------------------------------------------|-------------------|-------------------------------------|-----------------------------------------------------------------------------------------|----|---------|--|
| Left ventricular end-diastolic volume is larger in older trained (OT) women compared to older untrained (OU) and middle-aged (MA) women.                           | Left ventricular end-diastolic volume was not significantly different among groups        | Left ventricular end-diastolic volume       | Mean<br>MA 101.2<br>OU 95.4<br>OT 98.8      | SD<br>MA 17.7<br>OU 16.7<br>OT 13.0 | MA n=19<br>OU n=35<br>OT n=12 |                                                                             | ml                | OT vs. OU<br>OT vs. MA<br>MA vs. OU | One factor ANOVA<br>ANOVA<br>p=0.454                                                    | NA | Table 5 |  |
| Left ventricular end-diastolic volume index is larger in older trained (OT) women compared to older untrained (OU) and middle-aged (MA) women.                     | Left ventricular end-diastolic volume index was significantly larger in OT compared to OU | Left ventricular end-diastolic volume index | Mean<br>MA 58.8<br>OU 54.7<br>OT 63.7       | SD<br>MA 7.6<br>OU 8.3<br>OT 8.0    | MA n=19<br>OU n=35<br>OT n=12 | OT vs. OU<br><b>p=0.004</b><br>OT vs. MA<br>p=0.326<br>MA vs. OU<br>p=0.236 | ml/m <sup>2</sup> | OT vs. OU<br>OT vs. MA<br>MA vs. OU | One factor ANOVA<br>ANOVA<br><b>p=0.005</b><br>Bonferroni<br><i>post hoc</i><br>testing | NA | Table 5 |  |
| Left ventricular end-diastolic volume relative to fat-free mass is larger in older trained (OT) women compared to older untrained (OU) and middle-aged (MA) women. | Left ventricular end-diastolic volume was not significantly different among groups        | Left ventricular end-diastolic volume       | Mean<br>MA 2.5<br>OU 2.3<br>OT 2.5          | SD<br>MA 0.4<br>OU 0.4<br>OT 0.4    | MA n=18<br>OU n=35<br>OT n=12 |                                                                             | ml/kgFFM          | OT vs. OU<br>OT vs. MA<br>MA vs. OU | One factor ANOVA<br>ANOVA<br>p=0.218                                                    | NA | Table 5 |  |
| Left ventricular mass-to-volume ratio is larger in older trained (OT) women compared to older untrained                                                            | Left ventricular mass-to-volume ratio was not significantly                               | Left ventricular mass-to-volume ratio       | Median (25-75%)<br>MA 0.77<br>(0.69 - 0.92) |                                     | MA n=19<br>OU n=35<br>OT n=12 |                                                                             | g/ml              | OT vs. OU<br>OT vs. MA<br>MA vs. OU | Kruskal-Wallis ANOVA on ranks.<br>ANOVA<br>p=0.637                                      | NA | Table 5 |  |



# The Journal of Physiology Statistical Summary Document

|                                                                                                                                                   |                                                                                                   |                                                |                                                                                                             |                                        |                              |                                                                                           |          |                                             |                                                                                                     |    |         |  |
|---------------------------------------------------------------------------------------------------------------------------------------------------|---------------------------------------------------------------------------------------------------|------------------------------------------------|-------------------------------------------------------------------------------------------------------------|----------------------------------------|------------------------------|-------------------------------------------------------------------------------------------|----------|---------------------------------------------|-----------------------------------------------------------------------------------------------------|----|---------|--|
| (OU) and middle-aged (MA) women.                                                                                                                  | different among groups                                                                            |                                                | OU 0.80<br>(0.75 - 0.89)<br><br>OT 0.78<br>(0.75 - 0.92)                                                    |                                        |                              |                                                                                           |          |                                             |                                                                                                     |    |         |  |
| Total blood volume is larger in older trained (OT) women compared to older untrained (OU) and middle-aged (MA) women.                             | Total blood volume was not significantly different among groups                                   | Total blood volume                             | Mean<br>MA 4044.1<br>OU 4053.3<br>OT 4018.0                                                                 | SD<br>MA 592.0<br>OU 475.9<br>OT 417.0 | MA n=22<br>OU n=35<br>OT n=7 |                                                                                           | ml       | OT vs. OU<br><br>OT vs. MA<br><br>MA vs. OU | One factor ANOVA<br><br>ANOVA<br>p=0.986                                                            | NA | Table 5 |  |
| Total blood volume relative to total body mass is larger in older trained (OT) women compared to older untrained (OU) and middle-aged (MA) women. | Total blood volume relative to total body mass was significantly larger in OT compared to OU      | Total blood volume relative to total body mass | Median (25-75%)<br>MA 62.3<br>(56.5 - 69.5)<br><br>OU 60.8<br>(58.3 - 63.0)<br><br>OT 67.2<br>(64.5 - 75.6) |                                        | MA n=22<br>OU n=35<br>OT n=7 | OT vs. OU<br><b>p=0.015</b><br><br>OT vs. MA<br>p=0.129<br><br>MA vs. OU<br>p=0.873       | ml/kg    | OT vs. OU<br><br>OT vs. MA<br><br>MA vs. OU | Kruskal-Wallis ANOVA on ranks.<br><br>ANOVA<br><b>p=0.018</b><br><br>Dunn's <i>post hoc</i> testing | NA | Table 5 |  |
| Total blood volume relative to fat-free mass is larger in older trained (OT) women compared to older untrained (OU) and middle-aged (MA) women.   | Total blood volume relative to fat-free mass was significantly larger in OT compared to OU and MA | Total blood volume relative to fat-free mass   | Mean<br>MA 98.5<br>OU 98.5<br>OT 109.0                                                                      | SD<br>MA 9.4<br>OU 8.2<br>OT 10.2      | MA n=21<br>OU n=35<br>OT n=6 | OT vs. OU<br><b>p=0.028</b><br><br>OT vs. MA<br><b>p=0.039</b><br><br>MA vs. OU<br>p=1.00 | ml/kgFFM | OT vs. OU<br><br>OT vs. MA<br><br>MA vs. OU | One factor ANOVA<br><br>ANOVA<br><b>p=0.028</b><br><br>Bonferroni <i>post hoc</i> testing           | NA | Table 5 |  |
| Plasma volume is larger in older trained (OT)                                                                                                     | Plasma volume was not                                                                             | Plasma volume                                  | Mean<br>MA 2712.9                                                                                           | SD                                     | MA n=22<br>OU n=35<br>OT n=7 |                                                                                           | ml       | OT vs. OU<br><br>OT vs. MA                  | One factor ANOVA                                                                                    | NA | Table 5 |  |

# The Journal of Physiology Statistical Summary Document

|                                                                                                                                              |                                                                                         |                                           |                                                                                            |                                  |                              |                                                                             |          |                                     |                                                                                             |    |         |  |
|----------------------------------------------------------------------------------------------------------------------------------------------|-----------------------------------------------------------------------------------------|-------------------------------------------|--------------------------------------------------------------------------------------------|----------------------------------|------------------------------|-----------------------------------------------------------------------------|----------|-------------------------------------|---------------------------------------------------------------------------------------------|----|---------|--|
| women compared to older untrained (OU) and middle-aged (MA) women.                                                                           | significantly different among groups                                                    |                                           | OU 2664.6<br>OT 2662.6                                                                     | MA 394.8<br>OU 318.6<br>OT 325.3 |                              |                                                                             |          | MA vs. OU                           | ANOVA<br>p=0.868                                                                            |    |         |  |
| Plasma volume relative to total body mass is larger in older trained (OT) women compared to older untrained (OU) and middle-aged (MA) women. | Plasma volume relative to total body mass was significantly larger in OT compared to OU | Plasma volume relative to total body mass | Median (25-75%)<br>MA 43.2 (37.5 - 46.1)<br>OU 40.0 (37.5 - 41.4)<br>OT 44.9 (40.8 - 49.2) |                                  | MA n=22<br>OU n=35<br>OT n=7 | OT vs. OU<br><b>p=0.015</b><br>OT vs. MA<br>p=0.351<br>MA vs. OU<br>p=0.225 | ml/kg    | OT vs. OU<br>OT vs. MA<br>MA vs. OU | Kruskal-Wallis ANOVA on ranks.<br>ANOVA<br><b>p=0.010</b><br>Dunn's <i>post hoc</i> testing | NA | Table 5 |  |
| Plasma volume relative to fat-free mass is larger in older trained (OT) women compared to older untrained (OU) and middle-aged (MA) women.   | Plasma volume relative to fat-free mass was significantly larger in OT compared to OU   | Plasma volume relative to fat-free mass   | Mean<br>MA 66.1<br>OU 64.8<br>OT 71.9                                                      | SD<br>MA 6.4<br>OU 6.1<br>OT 7.0 | MA n=21<br>OU n=35<br>OT n=6 | OT vs. OU<br><b>p=0.041</b><br>OT vs. MA<br>p=0.158<br>MA vs. OU<br>p=1.00  | ml/kgFFM | OT vs. OU<br>OT vs. MA<br>MA vs. OU | One factor ANOVA<br>ANOVA<br><b>p=0.046</b><br>Bonferroni <i>post hoc</i> testing           | NA | Table 5 |  |

\*You may use multiple lines for the same question to indicate multiple comparisons

\*\* Authors may wish to make the text bold where p is considered significant against a stated confidence limit
